# Supplementary material for: Tai chi mind-body exercise in patients with COPD: study protocol for a randomized controlled trial
Source: PubMed Central journal article supplement (PMC4158042; doi:10.1186/1745-6215-15-337), 2014-08-28

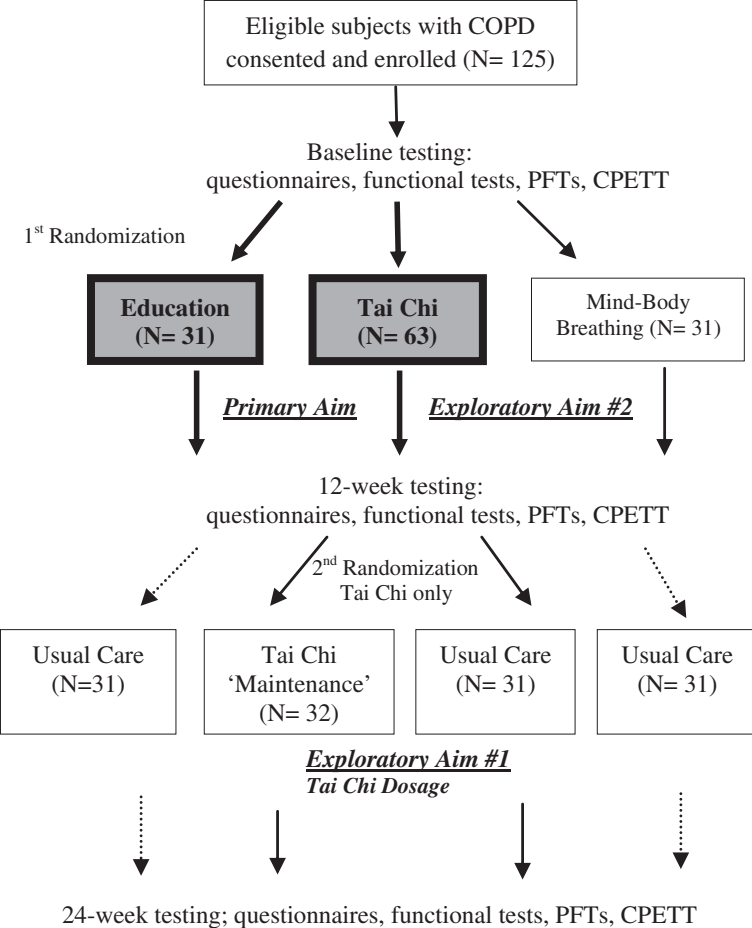

Supplement: 13063_2014_2212_MOESM3_ESM.pdf [file 13063_2014_2212_MOESM3_ESM.pdf]
